# Supplementary material for: Tunable synthesis of multiply twinned intermetallic Pd3Pb nanowire networks toward efficient N2 to NH3 conversion
Source: Royal Society of Chemistry journal article supplement (doi:10.1039/c9ta07519d), 2019-01-01
Supplement: c9ta07519d1.pdf [file c9ta07519d1.pdf]

Supplementary Information for

**Tunable synthesis of multiply-twinned intermetallic Pd<sub>3</sub>Pb nanowire networks toward efficient N<sub>2</sub> to NH<sub>3</sub> conversion**

Jingchun Guo,<sup>a</sup> Hui Wang,<sup>b</sup> Fei Xue,<sup>c</sup> Dan Yu,<sup>b</sup> Li Zhang,<sup>b</sup> Shilong Jiao,<sup>a</sup> Yihui Liu,<sup>b</sup> Yangfan Lu,<sup>d</sup> Maochang Liu,<sup>c</sup> Shuangchen Ruan,<sup>a</sup> Yu-Jia Zeng,<sup>\*a</sup> Chao Ma,<sup>\*b</sup> and Hongwen Huang<sup>\*bd</sup>

<sup>a</sup> Shenzhen Key Laboratory of Laser Engineering, College of Physics and Optoelectronic Engineering, Shenzhen University, Shenzhen 518060, P.R. China.

<sup>b</sup> College of Materials Science and Engineering, Hunan University, Changsha, Hunan 410082, P. R. China.

<sup>c</sup> International Research Center for Renewable Energy, State Key Laboratory of Multiphase Flow in Power Engineering, Xi'an Jiaotong University, Xi'an, Shaanxi 710049, P.R. China.

<sup>d</sup> State Key Lab of Silicon Materials, School of Materials Science and Engineering, Zhejiang University, Hangzhou 310027, P. R. China.

Correspondence and requests for materials should be addressed to Y.-J.Z. (email: yjzeng@szu.edu.cn), C.M. (email: cma@hnu.edu.cn) or to H.H. (email: huanghw@hnu.edu.cn).

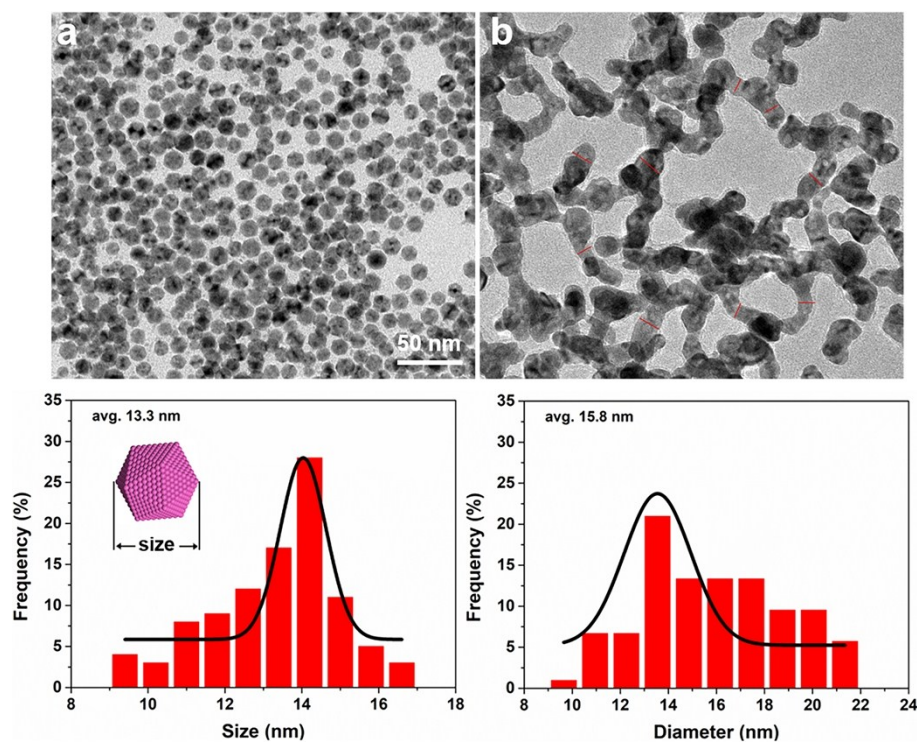

**Supplementary Figure S1.** The TEM images of Pd icosahedra with average sizes of (a) 13.3 nm and (b) the corresponding synthesized Pd<sub>3</sub>Pb MT-IM-PNNs with average diameter of 15.8 nm. The scale bars in (a) and (b) are 50 nm as shown in (a). The red lines in (b) represent the diameter of MT-IM-PNNs.

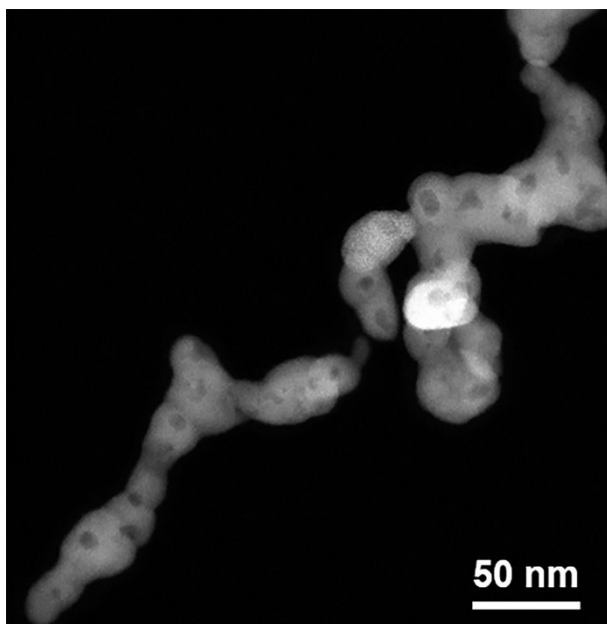

**Supplementary Figure S2.** Low-magnification HAADF-STEM image of Pd<sub>3</sub>Pb MT-IM-PNNs.

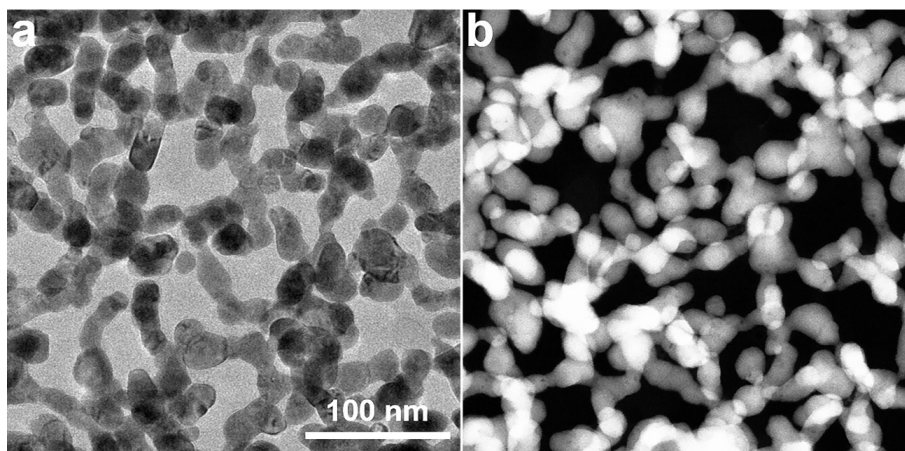

**Supplementary Figure S3.** (a) TEM image, and (b) Low-magnification HAADF-STEM image of Pd<sub>3</sub>Pb MT-IM-NNs. The scale bars in (a) and (b) are 100 nm as shown in (a).

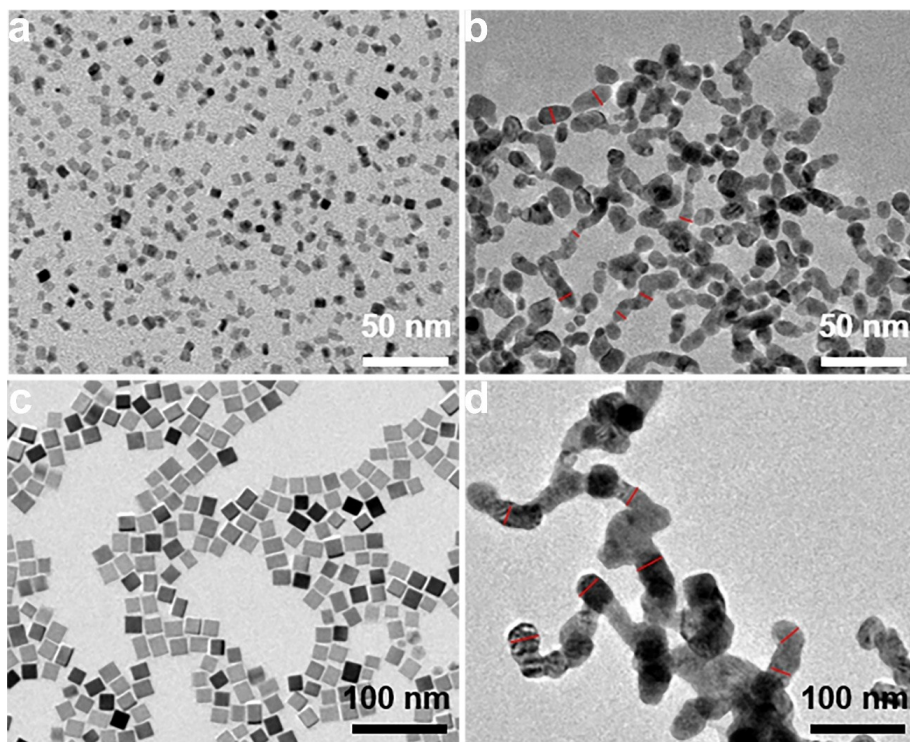

**Supplementary Figure S4.** The TEM images of Pd cubes with average sizes of (a) 5.7 nm and (c) 17.1 nm, respectively. (b) and (d) are the corresponding synthesized Pd<sub>3</sub>Pb MT-IM-NNs.

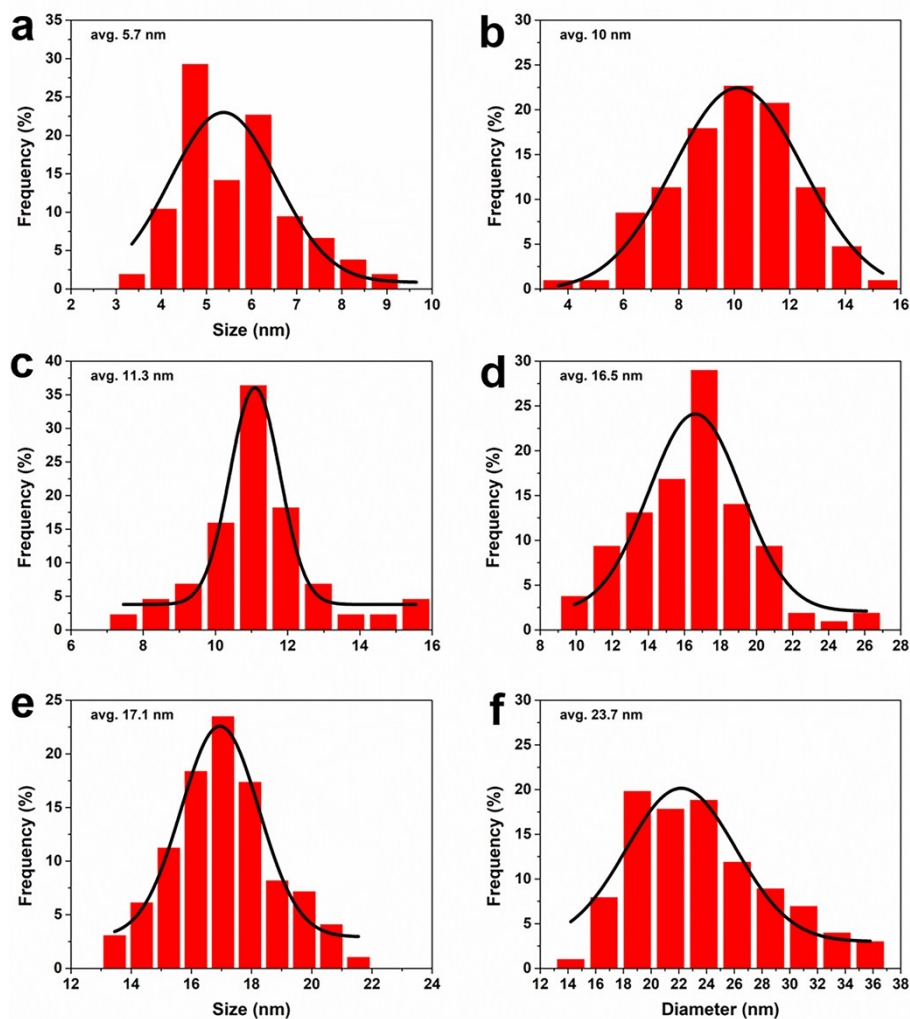

**Supplementary Figure S5.** The size distributions of different Pd cubes with average sizes of (a) 5.7 nm, (c) 11.3 nm and (e) 17.1 nm, respectively. (b), (d) and (f) are the diameter distributions of corresponding synthesized Pd<sub>3</sub>Pb MT-IM-NNs with average diameters of (a) 10 nm, (c) 16.5 nm and (e) 23.7 nm, respectively.

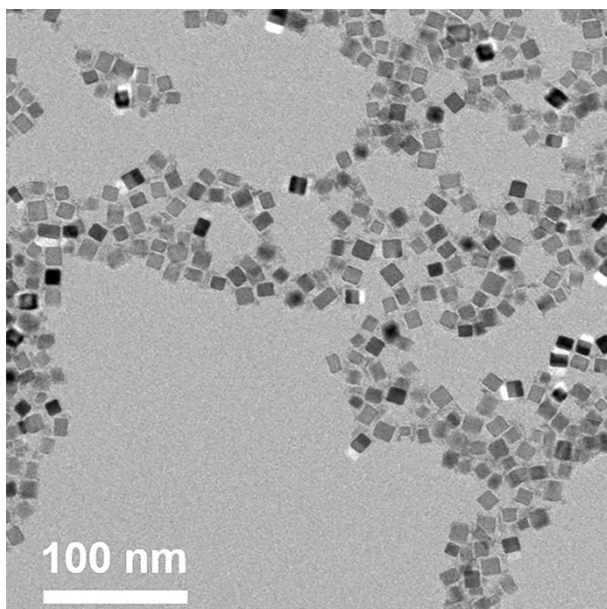

**Supplementary Figure S6.** The TEM images of Pd cubes, which were obtained by mixing 1.42 mg Pd cubes, 105 mg PVP and 4 mL DEG without  $\text{Pb}(\text{acac})_2$  at 180 °C for 24 h.

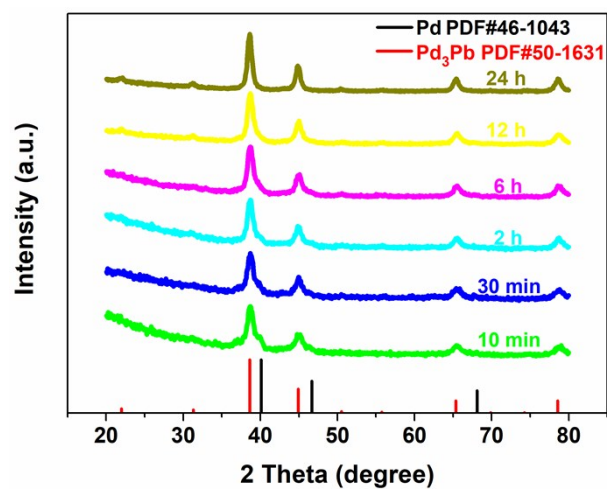

**Supplementary Figure S7.** Time-dependent XRD patterns of Pd<sub>3</sub>Pb MT-IM-NNs.



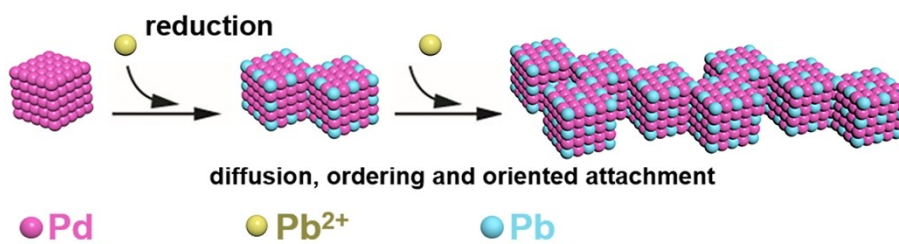

**Supplementary Figure S8.** Illustration of oriented-attachment formation mechanism using Pd cubes as seeds.

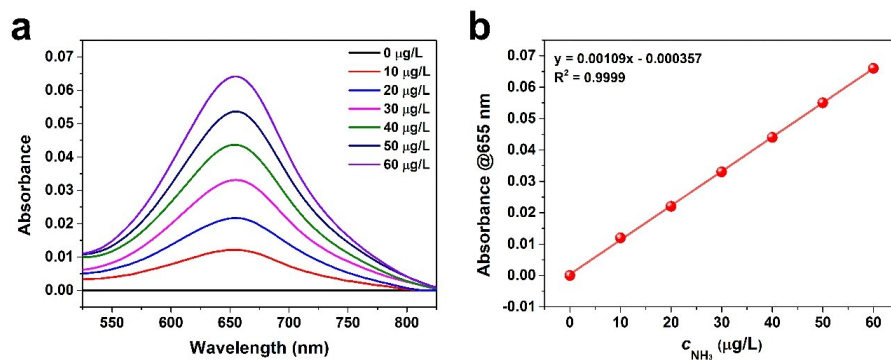

**Supplementary Figure S9.** Determination of the produced  $\text{NH}_3$  in 0.1 M  $\text{Na}_2\text{SO}_4$ . (a) The UV-Vis absorption spectra of various concentrations of standard  $\text{NH}_4\text{Cl}$  solutions in the presence of 0.1 M  $\text{Na}_2\text{SO}_4$  and (b) corresponding calibration curve for the colorimetric  $\text{NH}_3$  assay using the indophenol blue method.

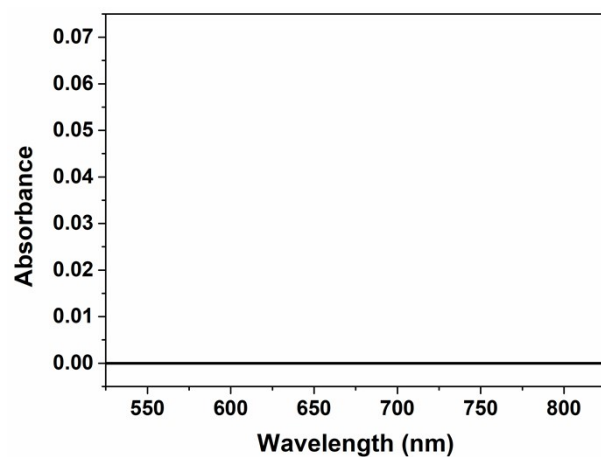

**Supplementary Figure S10.** The UV-Vis absorption spectrum of  $\text{Na}_2\text{SO}_4$  electrolyte, which was performed by putting the working electrode of  $\text{Pd}_3\text{Pb}$  MT-IM-PNNs into  $\text{N}_2$ -saturated electrolyte for 2.5 hours with an open circuit.

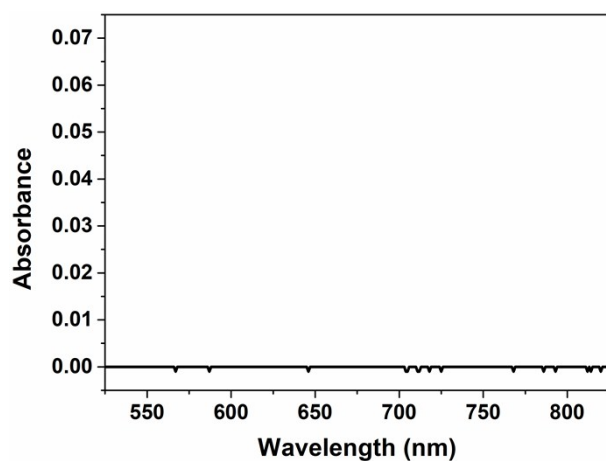

**Supplementary Figure S11.** The UV-Vis absorption spectrum of  $\text{Na}_2\text{SO}_4$  electrolyte, which was performed by putting the working electrode of  $\text{Pd}_3\text{Pb}$  MT-IM-PNNs into Ar-saturated electrolyte with applied potential of -0.2 V vs RHE.

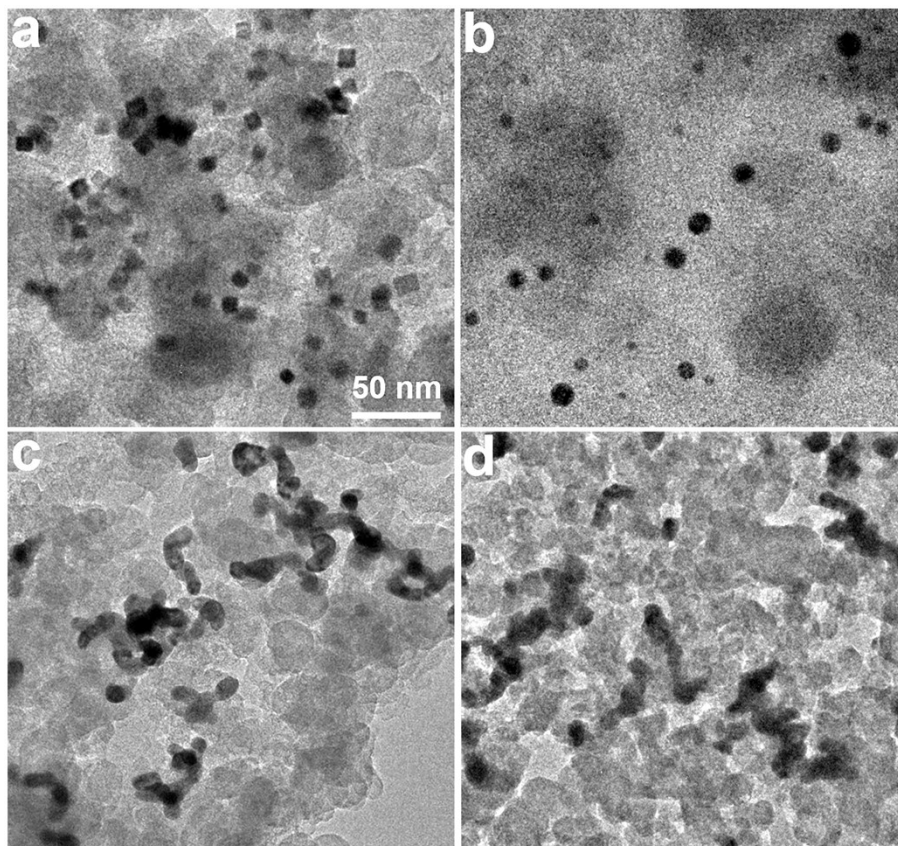

**Supplementary Figure S12.** TEM images of carbon black-supported (a) Pd cube, (b) Pd icosahedron, (c) Pd<sub>3</sub>Pb MT-IM-NNs, and (d) Pd<sub>3</sub>Pb MT-IM-PNNs, respectively. The scale bars are 50 nm as shown in (a).

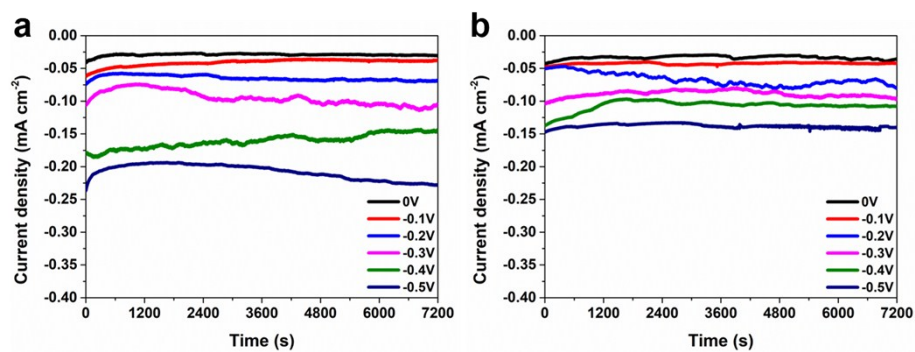

**Supplementary Figure S13.** Chronoamperometric curves of (a) Pd<sub>3</sub>Pb MT-IM-PNNs and (b) Pd<sub>3</sub>Pb MT-IM-NNs at the corresponding potentials in N<sub>2</sub>-saturated 0.1 M Na<sub>2</sub>SO<sub>4</sub> electrolyte.

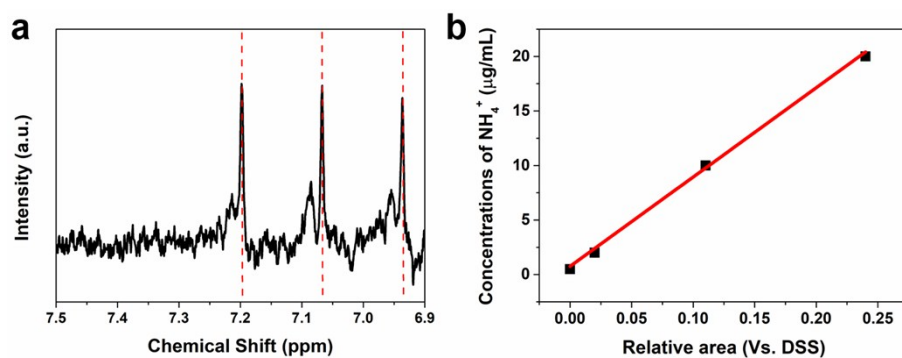

**Supplementary Figure S14.** (a)  $^1\text{H}$  Nuclear magnetic resonance (NMR) spectrum of  $\text{NH}_4^+$  in  $\text{Na}_2\text{SO}_4$  electrolyte after 24 h of electrochemical NRR test with applied potential of -0.2 V vs RHE. The  $\text{Na}_2\text{SO}_4$  electrolyte was concentrated from 30 mL to 0.5 mL to improve the signal-to-noise ratio. (b) Linear relationship between the  $\text{NH}_4^+$  concentration and relative area vs. DSS. The standard curve was made as follows: A 0.5 mL of  $\text{NH}_4\text{Cl}$  solution with different concentration (from 0.5 to 20  $\mu\text{g/mL}$ ) was mixed with 0.1 mL  $\text{D}_2\text{O}$  and 0.1 mL 6 mM DSS solution added as an internal standard.

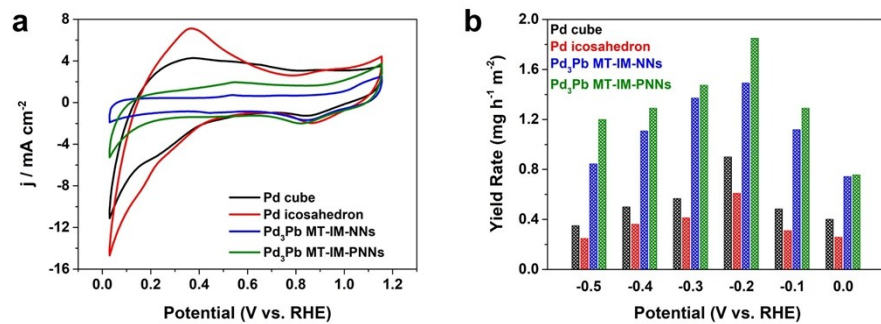

**Supplementary Figure S15.** (a) CV curves of Pd cube (black), Pd icosahedron (red), Pd<sub>3</sub>Pb MT-IM-NNs (blue), and Pd<sub>3</sub>Pb MT-IM-PNNs (olive) electrodes in N<sub>2</sub>-saturated 0.1 M KOH electrolyte at a scan rate of 50 mV/s. (b) The NH<sub>3</sub> yield rates normalized by calculated ECSAs of Pd cube (black), Pd icosahedron (red), Pd<sub>3</sub>Pb MT-IM-NNs (blue), and Pd<sub>3</sub>Pb MT-IM-PNNs (olive).



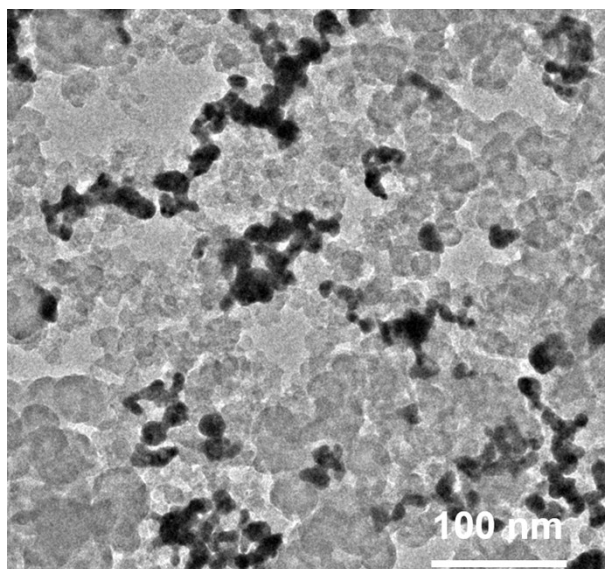

**Supplementary Figure S16.** TEM images of carbon black-supported Pd<sub>3</sub>Pb MT-IM-PNNs after stability test.

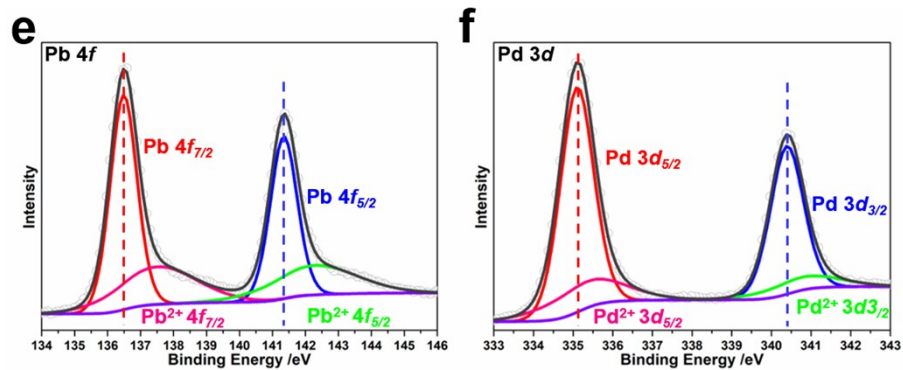

**Supplementary Figure S17.** XPS of (e) Pb 4f and (f) Pd 3d spectra of Pd<sub>3</sub>Pb MT-IM-PNNs after NRR test.

**Supplementary Table S1.** Comparison of the NRR performance of Pd<sub>3</sub>Pb MT-IM-PNNs with other electrocatalysts under ambient conditions.

| Catalyst                                                         | Electrolyte                           | Potential<br>(V vs. RHE) | Faradaic<br>efficiency (%) | Yield rate<br>( $\mu\text{g h}^{-1} \text{mg}_{\text{cat}}^{-1}$ ) | Ref.      |
|------------------------------------------------------------------|---------------------------------------|--------------------------|----------------------------|--------------------------------------------------------------------|-----------|
| <b>Noble metal-based electrocatalyst</b>                         |                                       |                          |                            |                                                                    |           |
| Pd <sub>3</sub> Pb MT-IM-HNWs                                    | 0.1 M Na <sub>2</sub> SO <sub>4</sub> | -0.2                     | 21.46                      | 18.2                                                               | This work |
| Au nanorods                                                      | 0.1 M KOH                             | -0.2                     | 3.88                       | 1.648                                                              | 1         |
| Au Sub-Nanoclusters                                              | 0.1 M HCl                             | 0.2                      | 8.11                       | 21.4                                                               | 2         |
| Au Nanoparticles                                                 | 0.1 M PBS                             | 0.1                      | 8.2                        | 4.4                                                                | 3         |
| Rh nanosheet                                                     | 0.1 M KOH                             | -0.2                     | 0.217                      | 23.88                                                              | 4         |
| Pd <sub>0.2</sub> Cu <sub>0.8</sub> Nanocluster                  | 0.1 M KOH                             | -0.2                     | 0.7                        | 2.8                                                                | 5         |
| Pd nanoparticles                                                 | 0.1 M PBS                             | 0.1                      | 8.2                        | 4.5                                                                | 6         |
| Pd <sub>3</sub> Cu <sub>1</sub> alloy                            | 0.1 M KOH                             | -0.25                    | 1.22                       | 39.9                                                               | 7         |
| <b>Noble metal-free electrocatalyst</b>                          |                                       |                          |                            |                                                                    |           |
| Bi <sub>4</sub> V <sub>2</sub> O <sub>11</sub> /CeO <sub>2</sub> | 0.1 M HCl                             | -0.2                     | 10.16                      | 23.21                                                              | 8         |
| MoS <sub>2</sub> nanoflower                                      | 0.1 M Na <sub>2</sub> SO <sub>4</sub> | -0.4                     | 8.34                       | 29.28                                                              | 9         |
| Mo <sub>2</sub> C/C nanosheets                                   | 0.5 M Li <sub>2</sub> SO <sub>4</sub> | -0.3                     | 7.8                        | 11.3                                                               | 10        |
| Nb <sub>2</sub> O <sub>5</sub> nanofiber                         | 0.1 M HCl                             | -0.55                    | 9.26                       | 43.6                                                               | 11        |
| Hollow Cr <sub>2</sub> O <sub>3</sub> microspheres               | 0.1 M Na <sub>2</sub> SO <sub>4</sub> | -0.9                     | 6.78                       | 25.3                                                               | 12        |
| BiVO <sub>4</sub>                                                | 0.2 M Na <sub>2</sub> SO <sub>4</sub> | -0.5                     | 10.04                      | 8.6                                                                | 13        |
| <b>Metal-free electrocatalyst</b>                                |                                       |                          |                            |                                                                    |           |
| B <sub>4</sub> C nanosheet                                       | 0.1 M HCl                             | -0.75                    | 15.59                      | 26.57                                                              | 14        |
| Carbon nitride                                                   | 0.1 M HCl                             | -0.2                     | 11.59                      | 8.09                                                               | 15        |
| N-doped porous carbon                                            | 0.1 M HCl                             | -0.2                     | 1.45                       | 15.7                                                               | 16        |
| Mesoporous boron nitride                                         | 0.1 M Na <sub>2</sub> SO <sub>4</sub> | -0.7                     | 5.5                        | 18.2                                                               | 17        |

## Supplementary References

- (1) D. Bao, Q. Zhang, F. Meng, H. Zhong, M. Shi, Y. Zhang, J. Yan, Q. Jiang, and X. Zhang, *Adv. Mater.* 2017, **29**, 1604799.
- (2) M. Shi, D. Bao, B. Wulan, Y. Li, Y. Zhang, J. Yan, and Q. Jiang, *Adv. Mater.* 2017, **29**, 1606550.
- (3) S. Li, D. Bao, M. Shi, B. Wulan, J. Yan, and Q. Jiang, *Adv. Mater.* 2017, **29**, 1700001.
- (4) H. Liu, S. Han, Y. Zhao, Y. Zhu, X. Tian, J. Zeng, J. Jiang, B. Xia, and Y. Chen, *J. Mater. Chem. A* 2018, **6**, 3211–3217.
- (5) M. Shi, D. Bao, S. Li, B. Wulan, J. Yan, and Q. Jiang, *Adv. Energy Mater.* 2018, **8**, 1800124.
- (6) J. Wang, L. Yu, L. Hu, X. G. Chen, H. Xin, and X. Feng, *Nat. Comm.* 2018, **9**, 1795.
- (7) F. Pang, Z. Wang, K. Zhang, J. He, W. Zhang, C. Guo, and Y. Ding, *Nano Energy* 2019, **58**, 834–841.
- (8) C. Lv, C. Yan, G. Chen, Y. Ding, J. Sun, Y. Zhou, and G. Yu, *Angew. Chem. Int. Ed.* 2018, **57**, 6073–6076.
- (9) X. Li, T. Li, Y. Ma, Q. Wei, W. Qiu, H. Guo, X. Shi, P. Zhang, A. Asiri, L. Chen, B. Tang, and X. Sun, *Adv. Energy Mater.* 2018, **8**, 1801357.
- (10) H. Cheng, L. Ding, G. Chen, L. Zhang, J. Xue, and H. Wang, *Adv. Mater.* 2018, **30**, 1803694.
- (11) J. Han, Z. Liu, Y. Ma, G. Cui, F. Xie, F. Wang, Y. Wu, S. Gao, Y. Xu, and X. Sun, *Nano Energy* 2018, **52**, 264–270.
- (12) Y. Zhang, W. Qiu, Y. Ma, Y. Luo, Z. Tian, G. Cui, F. Xie, L. Chen, T. Li, and X. Sun, *ACS Catal.*, 2018, **8**, 8540–8544.
- (13) J. Yao, D. Bao, Q. Zhang, M. Shi, Y. Wang, R. Gao, J. Yan, and Q. Jiang, *Small Methods* 2018, 1800333.
- (14) W. Qiu, X. Xie, J. Qiu, W. Fang, R. Liang, X. Ren, X. Ji, G. Cui, A. Asiri, G. Cui, B. Tang, and X. Sun, *Nat. Commun.*, 2018, **9**, 3485.
- (15) C. Lv, Y. Qian, C. Yan, Y. Ding, Y. Liu, G. Chen, and G. Yu, *Angew. Chem., Int. Ed.*, 2018, **57**, 10246–10250.

- (16) X. Yang, K. Li, D. Cheng, W. Pang, J. Lv, X. Chen, H. Zang, X. Wu, H. Tan, Y. Wang, and Y. Li, *J. Mater. Chem. A*, 2018, **6**, 7762–7769.
- (17) J. Zhao, X. Ren, X. Li, D. Fan, X. Sun, H. Ma, Q. Wei, and D. Wu, *Nanoscale*, 2019, **11**, 4231–4235.
